# Supplementary material for: Diversity of Mitochondrial DNA Haplogroups and Their Association with Bovine Antral Follicle Count
Source: MDPI journal article supplement (doi:10.3390/ani12182350), 2022-09-08
Supplement: s1 [file s1]

## *Supplementary Materials*

### **1 Supplementary Data**

Supplementary data exclude the following figures and tables can be found in other files of this supplementary material.

### **2 Supplementary Figures and Tables**

#### **2.1 Supplementary Figures**

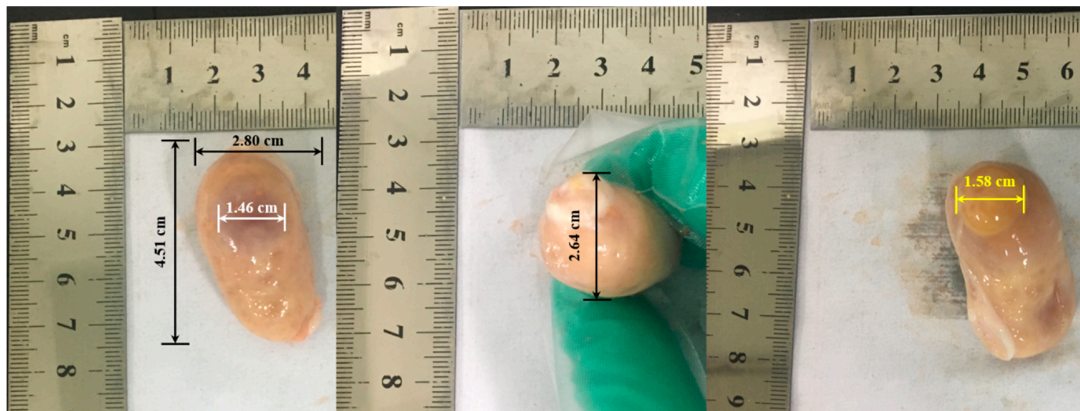

**Figure S1.** Morphological phenotypic traits of ovaries were measured by a double ruler. The black arrows and above records represent the length, width, height of ovaries, and the diameters of mature follicles and corpus luteum were shown in white and yellow arrows respectively.

## 2.2 Supplementary Tables

**Table S1. The results of Shapiro-Wilk test for different haplogroups.**

|                                        | Haplogroups         | statistics   | df        | <i>P</i> values |
|----------------------------------------|---------------------|--------------|-----------|-----------------|
| <b>Antral follicle count</b>           | <b>HG1 (n = 29)</b> | <b>0.650</b> | <b>29</b> | <b>4.29E-7</b>  |
| <b>(n = 115)</b>                       | <b>HG2 (n = 86)</b> | <b>0.444</b> | <b>86</b> | <b>1.94E-16</b> |
| <b>Weight of ovaries (g)</b>           | <b>HG1 (n = 29)</b> | <b>0.927</b> | <b>29</b> | <b>0.046</b>    |
| <b>(n = 115)</b>                       | <b>HG2 (n = 86)</b> | <b>0.960</b> | <b>86</b> | <b>0.009</b>    |
| Volume of ovaries (cm <sup>3</sup> )   | HG1 (n = 29)        | 0.956        | 29        | 0.264           |
| (n = 115)                              | <b>HG2 (n = 86)</b> | <b>0.955</b> | <b>86</b> | <b>0.005</b>    |
| Mean diameter of mature follicles (mm) | HG1 (n = 29)        | 0.978        | 29        | 0.776           |
| (n = 115)                              | HG2 (n = 86)        | 0.985        | 86        | 0.418           |
| <b>Number of corpus luteum</b>         | <b>HG1 (n = 29)</b> | <b>0.681</b> | <b>29</b> | <b>1E-5</b>     |
| <b>(n = 115)</b>                       | <b>HG2 (n = 86)</b> | <b>0.610</b> | <b>86</b> | <b>9.07E-14</b> |
| Mean diameter of corpus luteum (mm)    | HG1 (n = 29)        | 0.930        | 29        | 0.056           |
| (n = 115)                              | <b>HG2 (n = 86)</b> | <b>0.924</b> | <b>86</b> | <b>8.5E-4</b>   |

**Table S2. The results of Levene's test for reproductive traits in two-way ANCOVA model.**

|                                                        | F            | df1       | df2        | <i>P</i> values |
|--------------------------------------------------------|--------------|-----------|------------|-----------------|
| <b>Antral follicle count</b><br><b>(n = 115)</b>       | <b>4.461</b> | <b>10</b> | <b>104</b> | <b>3.1E-4</b>   |
| Weight of ovaries (g)<br>(n = 115)                     | 1.796        | 8         | 104        | 0.086*          |
| Volume of ovaries (cm <sup>3</sup> )<br>(n = 115)      | 1.810        | 10        | 104        | 0.068           |
| Mean diameter of mature<br>follicles (mm)<br>(n = 115) | 0.761        | 10        | 104        | 0.665           |
| <b>Number of corpus luteum</b><br><b>(n = 115)</b>     | <b>7.596</b> | <b>10</b> | <b>104</b> | <b>5.37E-9</b>  |
| Mean diameter of corpus<br>luteum (mm)<br>(n = 115)    | 1.082        | 10        | 104        | 0.383           |

**Note:** \*the *P* value of association of ovarian weight with different haplogroups was retrieved from two-way ANOVA without covariate:  $Y_{ij} = \mu + H_i + S_j + e_{ij}$ , where  $Y_{ij}$  is the overall mean value of ovarian weight,  $H_i$  is the fixed effect of haplogroup,  $S_j$  is the fixed effect of the types of CL, and  $e_{ij}$  is the random error.

**Table S3.** Interaction effects of different fixed factors with ovarian weight in two-way ANCOVA.

| Interaction effects                   | Reproductive traits                      | df       | Mean Square   | F             | <i>P</i> values |
|---------------------------------------|------------------------------------------|----------|---------------|---------------|-----------------|
| Haplotype * Ovarian weight            | Volume of ovaries                        | 1        | 15.472        | .704          | 0.404           |
|                                       | Number of corpus luteum                  | 1        | .119          | .196          | 0.659           |
|                                       | Mean diameter of corpus luteum           | 1        | 9.576         | .338          | 0.562           |
|                                       | <b>Antral follicle count</b>             | <b>1</b> | <b>3.140</b>  | <b>14.398</b> | <b>2.56E-3</b>  |
|                                       | Mean diameter of mature follicles        | 1        | 38.210        | 2.286         | 0.134           |
| CL types * Ovarian weight             | Volume of ovaries                        | 4        | 30.764        | 1.399         | 0.240           |
|                                       | Number of corpus luteum                  | 4        | .127          | .210          | 0.932           |
|                                       | Mean diameter of corpus luteum           | 4        | 17.978        | .635          | 0.639           |
|                                       | Antral follicle count                    | 4        | .472          | 2.165         | 0.079           |
|                                       | <b>Mean diameter of mature follicles</b> | <b>4</b> | <b>62.776</b> | <b>3.755</b>  | <b>0.007</b>    |
| Haplotype * CL types * Ovarian weight | Volume of ovaries                        | 4        | 14.910        | .678          | 0.609           |
|                                       | Number of corpus luteum                  | 4        | .006          | .010          | 1.000           |
|                                       | Mean diameter of corpus luteum           | 4        | 23.389        | .826          | 0.512           |
|                                       | Antral follicle count                    | 4        | .104          | .477          | 0.752           |
|                                       | Mean diameter of mature follicles        | 4        | 19.417        | 1.161         | 0.333           |

**Table S4.** Parameters estimation of dependent variables in two-way ANCOVA.

| Dependent variables               | Parameters                     | B      | SE    | t      | <i>P</i> values | 95% Confidence level |             |
|-----------------------------------|--------------------------------|--------|-------|--------|-----------------|----------------------|-------------|
|                                   |                                |        |       |        |                 | Lower Bound          | Upper Bound |
| Volume of ovaries                 | Intercept                      | -0.534 | 5.891 | -0.091 | 0.928           | -12.224              | 11.156      |
|                                   | Ovarian weight                 | 1.457  | 0.356 | 4.098  | 0.000           | 0.751                | 2.163       |
| Number of corpus luteum           | Intercept                      | 1.179  | 0.978 | 1.206  | 0.231           | -0.761               | 3.119       |
| Mean diameter of mature follicles | Intercept                      | -7.064 | 6.686 | -1.057 | 0.293           | -20.331              | 6.204       |
|                                   | [CL types=3]                   | 16.185 | 7.114 | 2.275  | 0.025           | 2.068                | 30.303      |
|                                   | Ovarian weight                 | 1.003  | 0.404 | 2.486  | 0.015           | 0.203                | 1.804       |
| Antral follicle count             | Intercept                      | 1.572  | 0.587 | 2.680  | 0.009           | 0.408                | 2.737       |
|                                   | [CL types =3] * Ovarian weight | 0.089  | 0.038 | 2.366  | 0.020           | 0.014                | 0.164       |
| Mean diameter of mature follicles | Intercept                      | -1.832 | 5.137 | -0.357 | 0.722           | -12.026              | 8.363       |
|                                   | [CL types =2]                  | 21.357 | 6.531 | 3.270  | 0.001           | 8.396                | 34.317      |
|                                   | Ovarian weight                 | 1.180  | 0.310 | 3.805  | 0.000           | 0.564                | 1.795       |
|                                   | [CL types =0] * Ovarian weight | -0.806 | 0.325 | -2.482 | 0.015           | -1.451               | -0.162      |
|                                   | [CL types =2] * Ovarian weight | -1.420 | 0.394 | -3.604 | 0.000           | -2.202               | -0.638      |
|                                   | [CL types =3] * Ovarian weight | -0.889 | 0.329 | -2.702 | 0.008           | -1.542               | -0.236      |

**Table S5.** Association of haplogroups with morphological phenotypic traits of ovaries.

|                                        | HG1        | HG2        | <i>P</i> values |
|----------------------------------------|------------|------------|-----------------|
| Weight of ovaries (g)                  | 13.71±1.23 | 13.17±0.55 | 0.268*          |
| (n = 115)                              | (n = 29)   | (n = 86)   |                 |
| Volume of ovaries (cm <sup>3</sup> )   | 19.25±1.92 | 18.77±0.99 | 0.887           |
| (n = 115)                              | (n = 29)   | (n = 86)   |                 |
| Mean diameter of mature follicles (mm) | 11.94±0.81 | 13.26±0.49 | 0.446           |
| (n = 115)                              | (n = 29)   | (n = 86)   |                 |
| Number of corpus luteum                | 1.62±0.18  | 1.62±0.12  | 0.768           |
| (n = 115)                              | (n = 29)   | (n = 86)   |                 |
| Mean diameter of corpus luteum (mm)    | 11.90±1.44 | 10.71±0.83 | 0.617           |
| (n = 115)                              | (n = 29)   | (n = 86)   |                 |

**Note:** \*the *P* value of association of ovarian weight with different haplogroups was retrieved from Scheirer–Ray–Hare test without covariate:  $Y_{ij} = \mu + H_i + S_j + e_{ij}$ , where  $Y_{ij}$  is the overall mean value of ovarian weight,  $H_i$  is the fixed effect of haplogroup,  $S_j$  is the fixed effect of the types of CL, and  $e_{ij}$  is the random error.

**Table S6.** Results of the Scheirer-Ray-Hare test of between-subjects effects on antral follicle count.

| Sources                     | <i>df</i> | Sum Sq      | H             | <i>P</i> values |
|-----------------------------|-----------|-------------|---------------|-----------------|
| <b>Haplogroup</b>           | <b>1</b>  | <b>3337</b> | <b>5.9960</b> | <b>0.01434</b>  |
| Types of CL                 | 5         | 2320        | 4.1683        | 0.52545         |
| Haplogroup * Types<br>of CL | 4         | 1427        | 2.5643        | 0.63315         |
| Error                       | 104       | 56335       |               |                 |
| Total                       | 114       |             |               |                 |
